# Supplementary material
Source: publisher figshare collection journal article supplement (https://acs.figshare.com/ndownloader/files/3899419)
Supplement: Supplementary file 1 [file 3899419]

## **Supporting Information**

# **Synthesis of PbS/PbI<sub>2</sub> Nanocomposites in Mixed Solvent and Their Composition-Dependent Electrogenerated Chemiluminescence Performance**

Suli Liu, Long Zhang, Yanrong Li, Min Han, Zhihui Dai,\*and Jianchun Bao\*

Jiangsu Key Laboratory of Biofunctional Materials, School of Chemistry and Materials Science, Nanjing Normal University, Nanjing 210023, P. R. China.

\*E-mail: daizhihuii@njnu.edu.cn; baojianchun@njnu.edu.cn

**Table S1. Different volume ratios of acetone to water used to synthesize samples**

| $V_{\text{acetone}}:V_{\text{water}}$ | $V_{\text{acetone}}(\text{mL})$ | $V_{\text{TAA}}(\text{mL})$ | $C_{\text{TAA}}(\text{M})$ | $V_{\text{NaOH}}(\text{mL})$ | $C_{\text{NaOH}}(\text{M})$ |
|---------------------------------------|---------------------------------|-----------------------------|----------------------------|------------------------------|-----------------------------|
| 2:1                                   | 8                               | 3                           | 0.05                       | 1                            | 0.625                       |
| 5:1                                   | 10                              | 1.5                         | 0.1                        | 0.5                          | 1.25                        |
| 1:1                                   | 6                               | 5                           | 0.03                       | 1                            | 0.625                       |

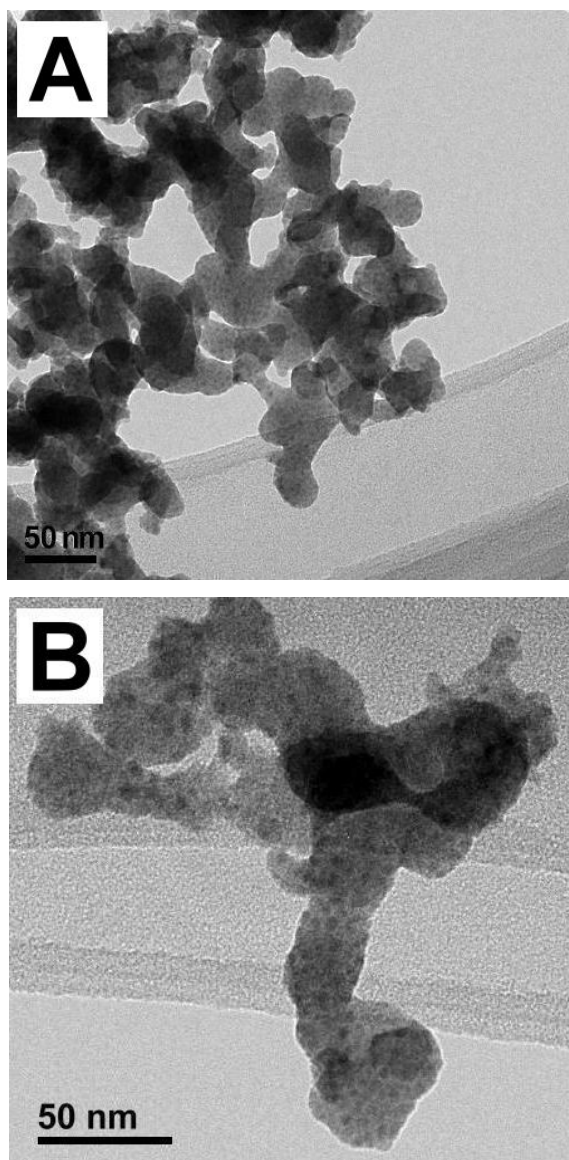

**Figure S1.** Lower (A) and higher (B) magnification TEM images of the PbS/PbI<sub>2</sub> nanocomposites.

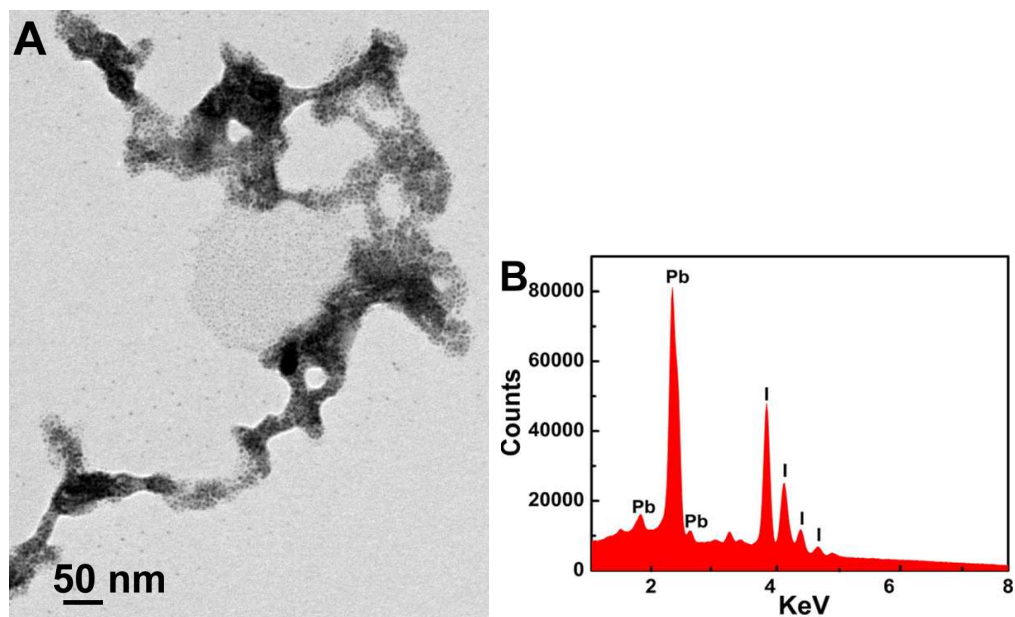

**Figure S2.** TEM image (A) and EDS spectrum (B) of  $\text{PbI}_2$  formed at the earlier stage by the addition of water to an acetone solution of  $\text{K}[\text{PbI}_3]/\text{tartaric acid}$ .

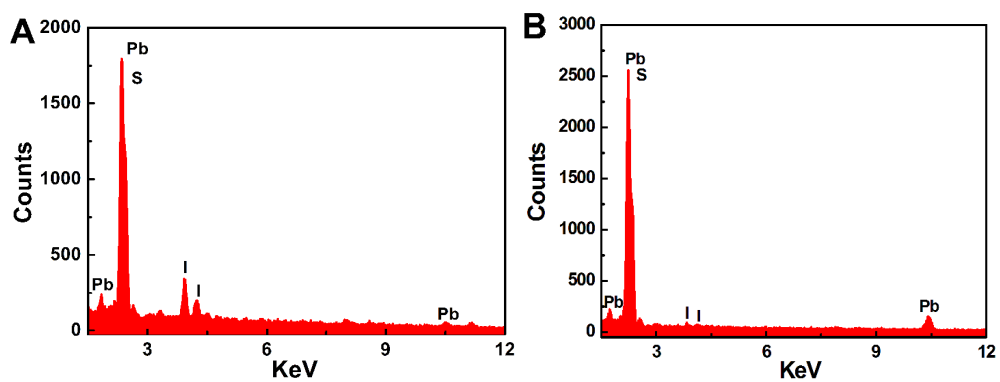

**Figure S3.** EDS spectra of  $\text{PbS}/\text{PbI}_2$  nanocomposites obtained under the volume ratios of acetone/water: 5:1(A) and 1:1 (B) and keeping the other conditions constant, respectively.
